# Supplementary material for: Exploring the Regulatory Role of XIST-microRNAs/mRNA Network in Circulating CD4+ T Cells of Hepatocellular Carcinoma Patients
Source: MDPI journal article supplement (doi:10.3390/biomedicines11071848), 2023-06-27
Supplement: s1 [file s1]

**Supplementary Table S1.** The clinical data of 20 people who participated in the NGS assessment of differential mRNA, lncRNA, and miRNA gene expression.

|                            | Health<br>( <i>n</i> = 10) | HCC<br>( <i>n</i> = 10) |
|----------------------------|----------------------------|-------------------------|
| Age (years, mean $\pm$ SD) | 36.70 $\pm$ 7.32           | 66.40 $\pm$ 10.84       |
| Gender                     |                            |                         |
| Male, <i>n</i> (%)         | 1 (10%)                    | 8 (80%)                 |
| Female, <i>n</i> (%)       | 9 (90%)                    | 2 (20%)                 |

**Supplementary Table S2.** The clinical data of 160 individuals who had their transcript expression validated using real-time qPCR.

|                            | Health<br>( <i>n</i> = 100) | HCC<br>( <i>n</i> = 60) |
|----------------------------|-----------------------------|-------------------------|
| Age (years, mean $\pm$ SD) | 38.19 $\pm$ 8.50            | 65.40 $\pm$ 10.03       |
| Gender                     |                             |                         |
| Male, <i>n</i> (%)         | 24 (24%)                    | 48 (80%)                |
| Female, <i>n</i> (%)       | 76 (76%)                    | 12 (20%)                |

**Supplementary Table S3.** The primers sequences used in real-time quantitative polymerase chain reaction.

| Targeted genes | Order   | Sequences                            |
|----------------|---------|--------------------------------------|
| XIST           | forward | 5'-ACGCTG CATGTGTCCTTAG-3'           |
|                | reverse | 5'-GAGCCT CTTATAAGCTGTTTG-3'         |
| ID1            | forward | 5'-GCAGGTAAACGTGCTGCTCTACGA-3'       |
|                | reverse | 5'-CGAGTTCAGCTCCAAGTGAAGGTC-3'       |
| IL-1 $\beta$   | forward | 5'-TCCATGTCCTTTGTACAAGGAGAAGAAAGT-3' |
|                | reverse | 5'-TCGCTTTTCCATCTTCTTCTTTGGGTAAT-3'  |
| ANXA3          | forward | 5'-ACTGAGATCCTGTGTTTAAGGAGCTT-3'     |
|                | reverse | 5'-GGCTCGATGCAGTCTTTCGG-3'           |
| PER1           | forward | 5'-GCCTCGGTACCAGCCATTCC -3'          |
|                | reverse | 5'-GGTGTGTGCCGCGTAGT-3'              |
| FN1            | forward | 5'-CCAGCCTACGGATGACTC-3'             |
|                | reverse | 5'-AATGACCAC TGCCAAAGC-3'            |
